# Supplementary material for: Phosphatase PTP4A3 Promotes Triple-Negative Breast Cancer Growth and Predicts Poor Patient Survival
Source: Oxford University Press journal article supplement (doi:10.1158/0008-5472.can-14-0673), 2016-02-26
Supplement: 00085472can140673-sup-128039_2_supp_0_61q34v.docx [file 00085472can140673-sup-128039_2_supp_0_61q34v.docx]

**Supplementary Table 2**

| **Multivariable Cox Proportional Hazards Analysis – Curtis Data Set** | | |
| --- | --- | --- |
| **Predictor** | **HR** | ***p*-value** |
| **PTP4A3 expression** |  |  |
| PTP4A3 Low | Reference |  |
| PTP4A3 High | 1.26 | 1.45E-02 |
| **ERα status** |  |  |
| ER+ | Reference |  |
| ER- | 1.46 | 3.47E-04 |
| **Tumor Grade** |  |  |
| Grade 1 | Reference |  |
| Grade 2 | 1.77 | 1.80E-02 |
| Grade 3 | 2.27 | 7.05E-04 |
| **Nodal Status** |  |  |
| N0 | Reference |  |
| N1+ | 2.43 | < 2E-16 |
