# Supplementary material for: Phosphatase PTP4A3 Promotes Triple-Negative Breast Cancer Growth and Predicts Poor Patient Survival
Source: Oxford University Press journal article supplement (doi:10.1158/0008-5472.can-14-0673), 2016-02-26
Supplement: 00085472can140673-sup-128039_2_supp_0_j1q361.xlsx [file 00085472can140673-sup-128039_2_supp_0_j1q361.xlsx]

## Sheet: Sheet1
ProbeSet	Name	Symbol	EntrezID
1552705_at	dual specificity phosphatase 19	DUSP19	142679
1553320_s_at	CDC14 cell division cycle 14 homolog C (S. cerevisiae)	CDC14C	168448
1555579_s_at	protein tyrosine phosphatase, receptor type, M	PTPRM	5797
1555612_s_at	glucose-6-phosphatase, catalytic subunit	G6PC	2538
1555758_a_at	cyclin-dependent kinase inhibitor 3	CDKN3	1033
1559496_at	pyrophosphatase (inorganic) 2	PPA2	27068
1563933_a_at	phospholipase D family, member 5	PLD5	200150
1566303_s_at	protein phosphatase 1, regulatory (inhibitor) subunit 11	PPP1R11	6992
200035_at	CTD nuclear envelope phosphatase 1	CTDNEP1	23399
200637_s_at	protein tyrosine phosphatase, receptor type, F	PTPRF	5792
200695_at	protein phosphatase 2, regulatory subunit A, alpha	PPP2R1A	5518
200726_at	protein phosphatase 1, catalytic subunit, gamma isozyme	PPP1CC	5501
200730_s_at	protein tyrosine phosphatase type IVA, member 1	PTP4A1	7803
200846_s_at	protein phosphatase 1, catalytic subunit, alpha isozyme	PPP1CA	5499
200913_at	protein phosphatase, Mg2+/Mn2+ dependent, 1G	PPM1G	5496
201041_s_at	dual specificity phosphatase 1	DUSP1	1843
201050_at	phospholipase D family, member 3	PLD3	23646
201375_s_at	protein phosphatase 2, catalytic subunit, beta isozyme	PPP2CB	5516
201537_s_at	dual specificity phosphatase 3	DUSP3	1845
201594_s_at	protein phosphatase 4, regulatory subunit 1	PPP4R1	9989
201598_s_at	inositol polyphosphate phosphatase-like 1	INPPL1	3636
201602_s_at	protein phosphatase 1, regulatory (inhibitor) subunit 12A	PPP1R12A	4659
201629_s_at	acid phosphatase 1, soluble	ACP1	52
201702_s_at	protein phosphatase 1, regulatory (inhibitor) subunit 10	PPP1R10	5514
201704_at	ectonucleoside triphosphate diphosphohydrolase 6 (putative)	ENTPD6	955
201853_s_at	cell division cycle 25 homolog B (S. pombe)	CDC25B	994
201877_s_at	protein phosphatase 2, regulatory subunit B', gamma	PPP2R5C	5527
201904_s_at	CTD (carboxy-terminal domain, RNA polymerase II, polypeptide A) small phosphatase-like	CTDSPL	10217
201957_at	protein phosphatase 1, regulatory (inhibitor) subunit 12B	PPP1R12B	4660
201979_s_at	protein phosphatase 5, catalytic subunit	PPP5C	5536
202006_at	protein tyrosine phosphatase, non-receptor type 12	PTPN12	5782
202105_at	immunoglobulin (CD79A) binding protein 1	IGBP1	3476
202166_s_at	protein phosphatase 1, regulatory (inhibitor) subunit 2	PPP1R2	5504
202187_s_at	protein phosphatase 2, regulatory subunit B', alpha	PPP2R5A	5525
202429_s_at	protein phosphatase 3, catalytic subunit, alpha isozyme	PPP3CA	5530
202459_s_at	lipin 2	LPIN2	9663
202464_s_at	6-phosphofructo-2-kinase/fructose-2,6-biphosphatase 3	PFKFB3	5209
202513_s_at	protein phosphatase 2, regulatory subunit B', delta	PPP2R5D	5528
202703_at	dual specificity phosphatase 11 (RNA/RNP complex 1-interacting)	DUSP11	8446
202716_at	protein tyrosine phosphatase, non-receptor type 1	PTPN1	5770
202767_at	acid phosphatase 2, lysosomal	ACP2	53
202782_s_at	inositol polyphosphate-5-phosphatase K	INPP5K	51763
202794_at	inositol polyphosphate-1-phosphatase	INPP1	3628
202797_at	SAC1 suppressor of actin mutations 1-like (yeast)	SACM1L	22908
202830_s_at	solute carrier family 37 (glucose-6-phosphate transporter), member 4	SLC37A4	2542
202897_at	signal-regulatory protein alpha	SIRPA	140885
202958_at	protein tyrosine phosphatase, non-receptor type 9	PTPN9	5780
203006_at	inositol polyphosphate-5-phosphatase, 40kDa	INPP5A	3632
203011_at	inositol(myo)-1(or 4)-monophosphatase 1	IMPA1	3612
203029_s_at	protein tyrosine phosphatase, receptor type, N polypeptide 2	PTPRN2	5799
203038_at	protein tyrosine phosphatase, receptor type, K	PTPRK	5796
203126_at	inositol(myo)-1(or 4)-monophosphatase 2	IMPA2	3613
203211_s_at	myotubularin related protein 2	MTMR2	8898
203332_s_at	inositol polyphosphate-5-phosphatase, 145kDa	INPP5D	3635
203367_at	dual specificity phosphatase 14	DUSP14	11072
203446_s_at	oculocerebrorenal syndrome of Lowe	OCRL	4952
203502_at	2,3-bisphosphoglycerate mutase	BPGM	669
203607_at	inositol polyphosphate-5-phosphatase F	INPP5F	22876
203656_at	FIG4 homolog, SAC1 lipid phosphatase domain containing (S. cerevisiae)	FIG4	9896
203764_at	discs, large (Drosophila) homolog-associated protein 5	DLGAP5	9787
203967_at	cell division cycle 6 homolog (S. cerevisiae)	CDC6	990
203997_at	protein tyrosine phosphatase, non-receptor type 3	PTPN3	5774
204014_at	dual specificity phosphatase 4	DUSP4	1846
204076_at	ectonucleoside triphosphate diphosphohydrolase 4	ENTPD4	9583
204160_s_at	ectonucleotide pyrophosphatase/phosphodiesterase 4 (putative)	ENPP4	22875
204201_s_at	protein tyrosine phosphatase, non-receptor type 13 (APO-1/CD95 (Fas)-associated phosphatase)	PTPN13	5783
204207_s_at	RNA guanylyltransferase and 5'-phosphatase	RNGTT	8732
204284_at	protein phosphatase 1, regulatory (inhibitor) subunit 3C	PPP1R3C	5507
204393_s_at	acid phosphatase, prostate	ACPP	55
204469_at	protein tyrosine phosphatase, receptor-type, Z polypeptide 1	PTPRZ1	5803
204507_s_at	protein phosphatase 3, regulatory subunit B, alpha	PPP3R1	5534
204554_at	protein phosphatase 1, regulatory (inhibitor) subunit 3D	PPP1R3D	5509
204566_at	protein phosphatase, Mg2+/Mn2+ dependent, 1D	PPM1D	8493
204611_s_at	protein phosphatase 2, regulatory subunit B', beta	PPP2R5B	5526
204638_at	acid phosphatase 5, tartrate resistant	ACP5	54
204664_at	alkaline phosphatase, placental	ALPP	250
204695_at	cell division cycle 25 homolog A (S. pombe)	CDC25A	993
204706_at	inositol polyphosphate-5-phosphatase, 72 kDa	INPP5E	56623
204720_s_at	DnaJ (Hsp40) homolog, subfamily C, member 6	DNAJC6	9829
204766_s_at	nudix (nucleoside diphosphate linked moiety X)-type motif 1	NUDT1	4521
204794_at	dual specificity phosphatase 2	DUSP2	1844
204852_s_at	protein tyrosine phosphatase, non-receptor type 7	PTPN7	5778
204944_at	protein tyrosine phosphatase, receptor type, G	PTPRG	5793
204945_at	protein tyrosine phosphatase, receptor type, N	PTPRN	5798
204960_at	protein tyrosine phosphatase, receptor type, C-associated protein	PTPRCAP	5790
205035_at	CTD (carboxy-terminal domain, RNA polymerase II, polypeptide A) phosphatase, subunit 1	CTDP1	9150
205048_s_at	phosphoserine phosphatase	PSPH	5723
205076_s_at	myotubularin related protein 11	MTMR11	10903
205167_s_at	cell division cycle 25 homolog C (S. pombe)	CDC25C	995
205171_at	protein tyrosine phosphatase, non-receptor type 4 (megakaryocyte)	PTPN4	5775
205231_s_at	epilepsy, progressive myoclonus type 2A, Lafora disease (laforin)	EPM2A	7957
205260_s_at	acylphosphatase 1, erythrocyte (common) type	ACYP1	97
205288_at	CDC14 cell division cycle 14 homolog A (S. cerevisiae)	CDC14A	8556
205376_at	inositol polyphosphate-4-phosphatase, type II, 105kDa	INPP4B	8821
205478_at	protein phosphatase 1, regulatory (inhibitor) subunit 1A	PPP1R1A	5502
205757_at	ectonucleoside triphosphate diphosphohydrolase 5	ENTPD5	957
205777_at	dual specificity phosphatase 9	DUSP9	1852
205948_at	protein tyrosine phosphatase, receptor type, T	PTPRT	11122
206084_at	protein tyrosine phosphatase, receptor type, R	PTPRR	5801
206191_at	ectonucleoside triphosphate diphosphohydrolase 3	ENTPD3	956
206227_at	cartilage intermediate layer protein, nucleotide pyrophosphohydrolase	CILP	8483
206345_s_at	paraoxonase 1	PON1	5444
206374_at	dual specificity phosphatase 8	DUSP8	1850
206452_x_at	protein phosphatase 2A activator, regulatory subunit 4	PPP2R4	5524
206492_at	fragile histidine triad gene	FHIT	2272
206547_s_at	protein phosphatase, EF-hand calcium binding domain 1	PPEF1	5475
206687_s_at	protein tyrosine phosphatase, non-receptor type 6	PTPN6	5777
206833_s_at	acylphosphatase 2, muscle type	ACYP2	98
206844_at	fructose-1,6-bisphosphatase 2	FBP2	8789
207140_at	alkaline phosphatase, intestinal	ALPI	248
207377_at	protein phosphatase 1, regulatory (inhibitor) subunit 2 pseudogene 9	PPP1R2P9	80316
207537_at	6-phosphofructo-2-kinase/fructose-2,6-biphosphatase 1	PFKFB1	5207
207749_s_at	protein phosphatase 2, regulatory subunit B'', alpha	PPP2R3A	5523
207830_s_at	protein phosphatase 1, regulatory (inhibitor) subunit 8	PPP1R8	5511
208022_s_at	CDC14 cell division cycle 14 homolog B (S. cerevisiae)	CDC14B	8555
208300_at	protein tyrosine phosphatase, receptor type, H	PTPRH	5794
208411_x_at	protein phosphatase, EF-hand calcium binding domain 2	PPEF2	5470
208615_s_at	protein tyrosine phosphatase type IVA, member 2	PTP4A2	8073
208735_s_at	CTD (carboxy-terminal domain, RNA polymerase II, polypeptide A) small phosphatase 2	CTDSP2	10106
208891_at	dual specificity phosphatase 6	DUSP6	1848
208932_at	protein phosphatase 4, catalytic subunit	PPP4C	5531
208955_at	deoxyuridine triphosphatase	DUT	1854
209171_at	inosine triphosphatase (nucleoside triphosphate pyrophosphatase)	ITPA	3704
209355_s_at	phosphatidic acid phosphatase type 2B	PPAP2B	8613
209392_at	ectonucleotide pyrophosphatase/phosphodiesterase 2	ENPP2	5168
209457_at	dual specificity phosphatase 5	DUSP5	1847
209529_at	phosphatidic acid phosphatase type 2C	PPAP2C	8612
209585_s_at	multiple inositol-polyphosphate phosphatase 1	MINPP1	9562
209586_s_at	prune homolog (Drosophila)	PRUNE	58497
209643_s_at	phospholipase D2	PLD2	5338
209692_at	eyes absent homolog 2 (Drosophila)	EYA2	2139
209695_at	protein tyrosine phosphatase type IVA, member 3	PTP4A3	11156
209696_at	fructose-1,6-bisphosphatase 1	FBP1	2203
209817_at	protein phosphatase 3, catalytic subunit, beta isozyme	PPP3CB	5532
209896_s_at	protein tyrosine phosphatase, non-receptor type 11	PTPN11	5781
210236_at	protein tyrosine phosphatase, receptor type, f polypeptide (PTPRF), interacting protein (liprin), alpha 1	PPFIA1	8500
210431_at	alkaline phosphatase, placental-like 2	ALPPL2	251
210830_s_at	paraoxonase 2	PON2	5445
210946_at	phosphatidic acid phosphatase type 2A	PPAP2A	8611
211034_s_at	chromosome 12 open reading frame 51	C12orf51	283450
211169_s_at	protein phosphatase 1, regulatory (inhibitor) subunit 3A	PPP1R3A	5506
211320_s_at	protein tyrosine phosphatase, receptor type, U	PTPRU	10076
211600_at	protein tyrosine phosphatase, receptor type, O	PTPRO	5800
211711_s_at	phosphatase and tensin homolog	PTEN	5728
212088_at	peptidase (mitochondrial processing) alpha	PMPCA	23203
212274_at	lipin 1	LPIN1	23175
212277_at	myotubularin related protein 4	MTMR4	9110
212494_at	tensin like C1 domain containing phosphatase (tensin 2)	TENC1	23371
212588_at	protein tyrosine phosphatase, receptor type, C	PTPRC	5788
212680_x_at	protein phosphatase 1, regulatory (inhibitor) subunit 14B	PPP1R14B	26472
212686_at	protein phosphatase, Mg2+/Mn2+ dependent, 1H	PPM1H	57460
212719_at	PH domain and leucine rich repeat protein phosphatase 1	PHLPP1	23239
212750_at	protein phosphatase 1, regulatory (inhibitor) subunit 16B	PPP1R16B	26051
212805_at	prune homolog 2 (Drosophila)	PRUNE2	158471
212828_at	synaptojanin 2	SYNJ2	8871
212990_at	synaptojanin 1	SYNJ1	8867
213137_s_at	protein tyrosine phosphatase, non-receptor type 2	PTPN2	5771
213225_at	protein phosphatase, Mg2+/Mn2+ dependent, 1B	PPM1B	5495
213278_at	myotubularin related protein 9	MTMR9	66036
213407_at	PH domain and leucine rich repeat protein phosphatase 2	PHLPP2	23035
213465_s_at	protein phosphatase 1, regulatory (inhibitor) subunit 7	PPP1R7	5510
213496_at	lipid phosphate phosphatase-related protein type 4	LPPR4	9890
213521_at	protein tyrosine phosphatase, non-receptor type 18 (brain-derived)	PTPN18	26469
213651_at	inositol polyphosphate-5-phosphatase J	INPP5J	27124
213695_at	paraoxonase 3	PON3	5446
213795_s_at	protein tyrosine phosphatase, receptor type, A	PTPRA	5786
213804_at	inositol polyphosphate-5-phosphatase, 75kDa	INPP5B	3633
213848_at	dual specificity phosphatase 7	DUSP7	1849
213849_s_at	protein phosphatase 2, regulatory subunit B, beta	PPP2R2B	5521
214043_at	protein tyrosine phosphatase, receptor type, D	PTPRD	5789
214429_at	myotubularin related protein 6	MTMR6	9107
214608_s_at	eyes absent homolog 1 (Drosophila)	EYA1	2138
214978_s_at	protein tyrosine phosphatase, receptor type, f polypeptide (PTPRF), interacting protein (liprin), alpha 4	PPFIA4	8497
215280_s_at	protein tyrosine phosphatase, receptor type, f polypeptide (PTPRF), interacting protein (liprin), alpha 3	PPFIA3	8541
215783_s_at	alkaline phosphatase, liver/bone/kidney	ALPL	249
215793_at	myotubularin related protein 7	MTMR7	9108
216095_x_at	myotubularin related protein 1	MTMR1	8776
216347_s_at	protein phosphatase 1, regulatory (inhibitor) subunit 13B	PPP1R13B	23368
217777_s_at	protein tyrosine phosphatase-like A domain containing 1	PTPLAD1	51495
217841_s_at	protein phosphatase methylesterase 1	PPME1	51400
217844_at	CTD (carboxy-terminal domain, RNA polymerase II, polypeptide A) small phosphatase 1	CTDSP1	58190
217848_s_at	pyrophosphatase (inorganic) 1	PPA1	5464
217956_s_at	enolase-phosphatase 1	ENOPH1	58478
218069_at	dCTP pyrophosphatase 1	DCTPP1	79077
218273_s_at	pyruvate dehyrogenase phosphatase catalytic subunit 1	PDP1	54704
218375_at	nudix (nucleoside diphosphate linked moiety X)-type motif 9	NUDT9	53343
218509_at	lipid phosphate phosphatase-related protein type 2	LPPR2	64748
218523_at	phospholysine phosphohistidine inorganic pyrophosphate phosphatase	LHPP	64077
218540_at	thiamine triphosphatase	THTPA	79178
218576_s_at	dual specificity phosphatase 12	DUSP12	11266
218609_s_at	nudix (nucleoside diphosphate linked moiety X)-type motif 2	NUDT2	318
218795_at	acid phosphatase 6, lysophosphatidic	ACP6	51205
218845_at	dual specificity phosphatase 22	DUSP22	56940
218849_s_at	protein phosphatase 1, regulatory (inhibitor) subunit 13 like	PPP1R13L	10848
218852_at	protein phosphatase 2, regulatory subunit B'', gamma	PPP2R3C	55012
218961_s_at	polynucleotide kinase 3'-phosphatase	PNKP	11284
219099_at	chromosome 12 open reading frame 5	C12orf5	57103
219144_at	dual specificity phosphatase 26 (putative)	DUSP26	78986
219264_s_at	protein phosphatase 2, regulatory subunit B'', beta	PPP2R3B	28227
219347_at	nudix (nucleoside diphosphate linked moiety X)-type motif 15	NUDT15	55270
219654_at	protein tyrosine phosphatase-like (proline instead of catalytic arginine), member A	PTPLA	9200
219732_at	lipid phosphate phosphatase-related protein type 1	LPPR1	54886
219855_at	nudix (nucleoside diphosphate linked moiety X)-type motif 11	NUDT11	55190
219963_at	dual specificity phosphatase 13	DUSP13	51207
220082_at	protein phosphatase 1, regulatory (inhibitor) subunit 14D	PPP1R14D	54866
220205_at	transmembrane phosphatase with tensin homology	TPTE	7179
220515_at	dual specificity phosphatase 21	DUSP21	63904
220537_at	myotubularin related protein 8	MTMR8	55613
220798_x_at	lipid phosphate phosphatase-related protein type 3	LPPR3	79948
221256_s_at	haloacid dehalogenase-like hydrolase domain containing 3	HDHD3	81932
221453_at	glucose-6-phosphatase, catalytic, 2	G6PC2	57818
221548_s_at	integrin-linked kinase-associated serine/threonine phosphatase	ILKAP	80895
221563_at	dual specificity phosphatase 10	DUSP10	11221
221579_s_at	nudix (nucleoside diphosphate linked moiety X)-type motif 3	NUDT3	11165
221753_at	slingshot homolog 1 (Drosophila)	SSH1	54434
221759_at	glucose 6 phosphatase, catalytic, 3	G6PC3	92579
221817_at	dolichyl pyrophosphate phosphatase 1	DOLPP1	57171
221840_at	protein tyrosine phosphatase, receptor type, E	PTPRE	5791
222143_s_at	myotubularin related protein 14	MTMR14	64419
222351_at	protein phosphatase 2, regulatory subunit A, beta	PPP2R1B	5519
222467_s_at	protein phosphatase 6, regulatory subunit 3	PPP6R3	55291
222622_at	phosphoglycolate phosphatase	PGP	283871
222654_at	inositol monophosphatase domain containing 1	IMPAD1	54928
222858_s_at	dual adaptor of phosphotyrosine and 3-phosphoinositides	DAPP1	27071
222893_s_at	RNA polymerase II associated protein 2	RPAP2	79871
223100_s_at	nudix (nucleoside diphosphate linked moiety X)-type motif 5	NUDT5	11164
223150_s_at	protein tyrosine phosphatase, non-receptor type 23	PTPN23	25930
223207_x_at	phosphohistidine phosphatase 1	PHPT1	29085
223270_at	CTD (carboxy-terminal domain, RNA polymerase II, polypeptide A) small phosphatase like 2	CTDSPL2	51496
223272_s_at	nucleoside-triphosphatase, cancer-related	NTPCR	84284
223391_at	sphingosine-1-phosphate phosphatase 1	SGPP1	81537
223401_at	chromosome 17 open reading frame 48	C17orf48	56985
223402_at	dual specificity phosphatase 23	DUSP23	54935
223535_at	nudix (nucleoside diphosphate linked moiety X)-type motif 12	NUDT12	83594
223808_s_at	protein tyrosine phosphatase, mitochondrial 1	PTPMT1	114971
224506_s_at	phosphatidic acid phosphatase type 2 domain containing 3	PPAPDC3	84814
224692_at	protein phosphatase 1, regulatory (inhibitor) subunit 15B	PPP1R15B	84919
224832_at	dual specificity phosphatase 16	DUSP16	80824
224902_at	pyruvate dehydrogenase phosphatase regulatory subunit	PDPR	55066
224913_s_at	translocase of inner mitochondrial membrane 50 homolog (S. cerevisiae)	TIMM50	92609
225066_at	protein phosphatase 2, regulatory subunit B, delta	PPP2R2D	55844
225124_at	protein phosphatase 1, regulatory (inhibitor) subunit 9B	PPP1R9B	84687
225204_at	PTC7 protein phosphatase homolog (S. cerevisiae)	PPTC7	160760
225232_at	myotubularin related protein 12	MTMR12	54545
225287_s_at	transmembrane protein 55B	TMEM55B	90809
225426_at	protein phosphatase 6, catalytic subunit	PPP6C	5537
225630_at	endonuclease/exonuclease/phosphatase family domain containing 1	EEPD1	80820
225810_at	myotubularin related protein 10	MTMR10	54893
226074_at	protein phosphatase, Mg2+/Mn2+ dependent, 1M	PPM1M	132160
226080_at	slingshot homolog 2 (Drosophila)	SSH2	85464
226150_at	phosphatidic acid phosphatase type 2 domain containing 1B	PPAPDC1B	84513
226170_at	eyes absent homolog 3 (Drosophila)	EYA3	2140
226229_s_at	SSU72 RNA polymerase II CTD phosphatase homolog (S. cerevisiae)	SSU72	29101
226243_at	peptidyl-tRNA hydrolase domain containing 1	PTRHD1	391356
226338_at	transmembrane protein 55A	TMEM55A	55529
226380_at	protein tyrosine phosphatase, non-receptor type 21	PTPN21	11099
226571_s_at	protein tyrosine phosphatase, receptor type, S	PTPRS	5802
226636_at	phospholipase D1, phosphatidylcholine-specific	PLD1	5337
226733_at	6-phosphofructo-2-kinase/fructose-2,6-biphosphatase 2	PFKFB2	5208
226925_at	acid phosphatase-like 2	ACPL2	92370
226956_at	myotubularin related protein 3	MTMR3	8897
227037_at	phospholipase D family, member 6	PLD6	201164
227087_at	inositol polyphosphate-4-phosphatase, type I, 107kDa	INPP4A	3631
227098_at	dual specificity phosphatase 18	DUSP18	150290
227385_at	phosphatidic acid phosphatase type 2 domain containing 2	PPAPDC2	403313
227396_at	protein tyrosine phosphatase, receptor type, J	PTPRJ	5795
227413_at	ubiquitin-like domain containing CTD phosphatase 1	UBLCP1	134510
227728_at	protein phosphatase, Mg2+/Mn2+ dependent, 1A	PPM1A	5494
227741_at	protein tyrosine phosphatase-like (proline instead of catalytic arginine), member b	PTPLB	201562
228010_at	protein phosphatase 2, regulatory subunit B, gamma	PPP2R2C	5522
228013_at	protein phosphatase 2, regulatory subunit B, alpha	PPP2R2A	5520
228222_at	protein phosphatase 1, catalytic subunit, beta isozyme	PPP1CB	5500
228494_at	protein phosphatase 1, regulatory (inhibitor) subunit 9A	PPP1R9A	55607
228499_at	6-phosphofructo-2-kinase/fructose-2,6-biphosphatase 4	PFKFB4	5210
228763_at	magnesium-dependent phosphatase 1	MDP1	145553
229001_at	protein phosphatase 1, regulatory (inhibitor) subunit 3E	PPP1R3E	90673
229088_at	ectonucleotide pyrophosphatase/phosphodiesterase 1	ENPP1	5167
229211_at	dual specificity phosphatase 28	DUSP28	285193
229415_at	cytochrome c, somatic	CYCS	54205
229484_at	protein phosphatase, Mg2+/Mn2+ dependent, 1J	PPM1J	333926
230229_at	discs, large homolog 1 (Drosophila)	DLG1	1739
230250_at	protein tyrosine phosphatase, receptor type, B	PTPRB	5787
230370_x_at	serine/threonine/tyrosine interacting-like 1	STYXL1	51657
230402_at	dual specificity phosphatase 15	DUSP15	128853
230430_at	ectonucleoside triphosphate diphosphohydrolase 2	ENTPD2	954
230434_at	phosphatase, orphan 2	PHOSPHO2	493911
231101_at	protein phosphatase 2, regulatory subunit B', epsilon isoform	PPP2R5E	5529
231914_at	nudix (nucleoside diphosphate linked moiety X)-type motif 14	NUDT14	256281
232073_at	protein tyrosine phosphatase, receptor type, f polypeptide (PTPRF), interacting protein (liprin), alpha 2	PPFIA2	8499
232103_at	3'(2'), 5'-bisphosphate nucleotidase 1	BPNT1	10380
232252_at	dual specificity phosphatase 27 (putative)	DUSP27	92235
232737_s_at	ectonucleotide pyrophosphatase/phosphodiesterase 3	ENPP3	5169
232861_at	pyruvate dehyrogenase phosphatase catalytic subunit 2	PDP2	57546
232966_at	lipin 3	LPIN3	64900
233002_at	protein phosphatase 4, regulatory subunit 4	PPP4R4	57718
233470_at	protein tyrosine phosphatase, non-receptor type 5 (striatum-enriched)	PTPN5	84867
235061_at	protein phosphatase, Mg2+/Mn2+ dependent, 1K	PPM1K	152926
235802_at	phospholipase D family, member 4	PLD4	122618
236044_at	phosphatidic acid phosphatase type 2 domain containing 1A	PPAPDC1A	196051
236218_at	phosphatase, orphan 1	PHOSPHO1	162466
236302_at	protein phosphatase, Mg2+/Mn2+ dependent, 1E	PPM1E	22843
236539_at	protein tyrosine phosphatase, non-receptor type 22 (lymphoid)	PTPN22	26191
238567_at	sphingosine-1-phosphate phosphatase 2	SGPP2	130367
238719_at	protein phosphatase 2, catalytic subunit, alpha isozyme	PPP2CA	5515
238841_at	protein tyrosine phosphatase domain containing 1	PTPDC1	138639
238877_at	eyes absent homolog 4 (Drosophila)	EYA4	2070
238930_at	protein phosphatase, Mg2+/Mn2+ dependent, 1N (putative)	PPM1N	147699
239289_x_at	FANCD2/FANCI-associated nuclease 1	FAN1	22909
239855_at	protein phosphatase, Mg2+/Mn2+ dependent, 1L	PPM1L	151742
241596_at	nudix (nucleoside diphosphate linked moiety X)-type motif 10	NUDT10	170685
241715_x_at	acid phosphatase, testicular	ACPT	93650
242321_at	protein tyrosine phosphatase, non-receptor type 14	PTPN14	5784
242408_at	serine/threonine/tyrosine interacting protein	STYX	6815
242825_at	lipid phosphate phosphatase-related protein type 5	LPPR5	163404
244050_at	protein tyrosine phosphatase-like A domain containing 2	PTPLAD2	401494
32541_at	protein phosphatase 3, catalytic subunit, gamma isozyme	PPP3CC	5533
36920_at	myotubularin 1	MTM1	4534
37028_at	protein phosphatase 1, regulatory (inhibitor) subunit 15A	PPP1R15A	23645
37384_at	protein phosphatase, Mg2+/Mn2+ dependent, 1F	PPM1F	9647
39835_at	SET binding factor 1	SBF1	6305
46323_at	calcium activated nucleotidase 1	CANT1	124583
51192_at	slingshot homolog 3 (Drosophila)	SSH3	54961
